# Supplementary material for: FDA-Approved Amoxapine Effectively Promotes Macrophage Control of Mycobacteria by Inducing Autophagy
Source: PubMed Central journal article supplement (PMC9602717; doi:10.1128/spectrum.02509-22), 2022-09-21
Supplement: spectrum.02509-22-s0001.pdf [file spectrum.02509-22-s0001.pdf]

**Table S1:** Fifty-eight FDA-approved drugs used for the study

| <b>Drug Name</b>            | <b>Drug class</b>                                                            |
|-----------------------------|------------------------------------------------------------------------------|
| Propafenone-HCl             | Antiarrhythmic                                                               |
| Dihydroergotamine mesylate  | Antimigraine, Vasoconstrictor, Analgesic                                     |
| Haloperidol                 | Antipsychotic, Schizophrenia treatment                                       |
| Apomorphine-HCl hemihydrate | Non selective dopamine agonist and anti - Parkinsonian                       |
| Promethazine-HCl            | Anti-Allergic, Sedative                                                      |
| Quetiapine Fumarate         | Antipsychotic                                                                |
| Imipramine                  | Antidepressant                                                               |
| Amoxapine                   | Antidepressant                                                               |
| Entacapone                  | Antiparkinsonian                                                             |
| Carvedilol                  | Antihypertensive, Congestive heart failure treatment                         |
| Gefitinib                   | Antineoplastic                                                               |
| Nimodipine                  | Antihypertensive, Vasodilator                                                |
| Trifluoperazine-HCl         | Antipsychotic, Antiemetics                                                   |
| Bromocriptine mesylate      | Antiparkinson, Antidyskinetic                                                |
| Ethacrynic acid             | Diuretic                                                                     |
| Raloxifene-HCl              | Antihypocalcemic, Osteoporosis Prophylactic, Bone Density Conservation Agent |
| Zafirlukast                 | Antiasthmatic                                                                |
| Granisetron-HCl             | Antiemetic                                                                   |
| Aspirin                     | Analgesic                                                                    |
| Mesalamine                  | Anti-inflammatory                                                            |
| Carboplatin                 | Antineoplastic                                                               |
| Danazol                     | Estrogen Antagonist, Endometriosis treatment                                 |
| Estrone                     | Antineoplastic, Estrogen                                                     |
| Fenoprofen-Ca               | Analgesic                                                                    |
| Fenofibrate                 | Antilipidemic                                                                |
| Finasteride                 | Benign prostatic hypertrophy treatment                                       |
| Fluorouracil                | Antineoplastic                                                               |
| Gemfibrozil                 | Antilipemic                                                                  |
| Itraconazole                | Antifungal                                                                   |

|                          |                                                                                                                           |
|--------------------------|---------------------------------------------------------------------------------------------------------------------------|
| Levonorgestrel           | Contraceptive                                                                                                             |
| Loratadine               | Anti-Allergic, Antihistamine                                                                                              |
| Losartan-K               | Antihypertensive, Antiarrhythmic                                                                                          |
| Mebendazole              | Anthelmintic                                                                                                              |
| Mefenamic acid           | Non-steroidal anti-inflammatory, Analgesic, Antipyretic                                                                   |
| Melphalan                | A chemotherapy drug. Can be used as treatment for ovarian cancer and multiple myeloma.                                    |
| Methyldopa sesquihydrate | An antihypertensive agent                                                                                                 |
| Methylprednisolone       | Anti-inflammatory, Antiemetic, Neuroprotective                                                                            |
| Nabumetone               | Nonsteroidal anti-inflammatory, Antineoplastic                                                                            |
| Pantoprazole             | Treats gastroesophageal reflux disease (GERD) and damage to the esophagus. Also treats high levels of acid in the stomach |
| Paroxetine-HCl           | Antidepressant                                                                                                            |
| Misoprostol              | Anti-Ulcer Agent, Abortifacient Agent                                                                                     |
| Mifepristone             | Contraceptive                                                                                                             |
| Megestrol acetate        | Contraceptive, Hormonal, Antineoplastic                                                                                   |
| Asenapine maleate        | Antipsychotic                                                                                                             |
| Carglumic Acid           | Hyperammonaemia treatment                                                                                                 |
| Carmustine               | Antineoplastic                                                                                                            |
| Colchicine               | A natural product that is used as a medication used for gout                                                              |
| Desogestrel              | Contraceptive                                                                                                             |
| Doxapram-HCl             | Respiratory stimulant                                                                                                     |
| Epinastine-HCl           | Antiallergic, Antihistamine, Mast cell stabilizer                                                                         |
| Ethinyl Estradiol        | Contraceptive                                                                                                             |
| Etonogestrel             | Hormonal contraceptive                                                                                                    |
| Metaxalone               | Hypnotic/Sedative, Muscle Relaxant                                                                                        |
| Mometasone Furoate       | Anti-inflammatory, antiallergic                                                                                           |
| Nitisinone               | hereditary tyrosinemia type 1 treatment                                                                                   |
| Orlistat                 | Anti-Obesity Agent                                                                                                        |
| Podofilox                | Antineoplastic                                                                                                            |
| Trimipramine maleate     | Antidepressant                                                                                                            |



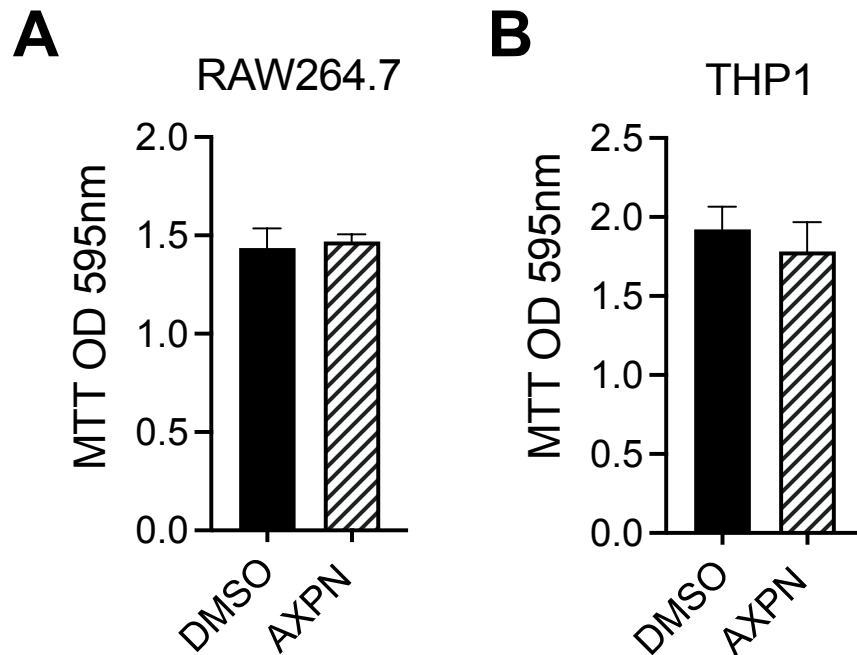

**Supplementary Figure 2.** Amoxapine has no significant cytotoxicity on macrophages at 10 μM. (A) RAW 264.7 cells were treated with 10 μM Amoxapine for 2 days and cell viability was measured by MTT assay. (B) THP1 cells were treated with 10 μM Amoxapine for 3 days and MTT assay was used to measure cell viability. The data represent the means ± SD for two independent experiments. The student t-test was used for statistical analysis.

**A**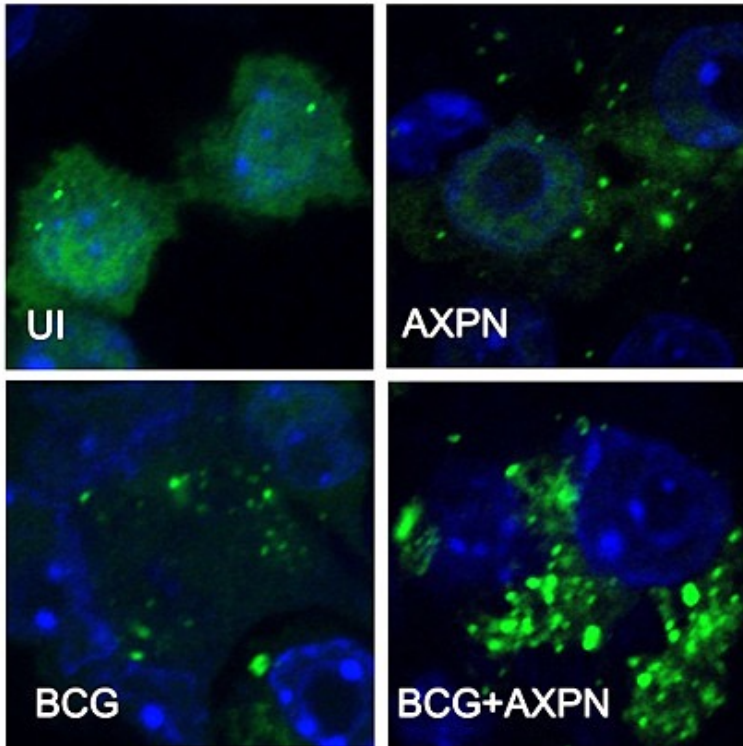**B**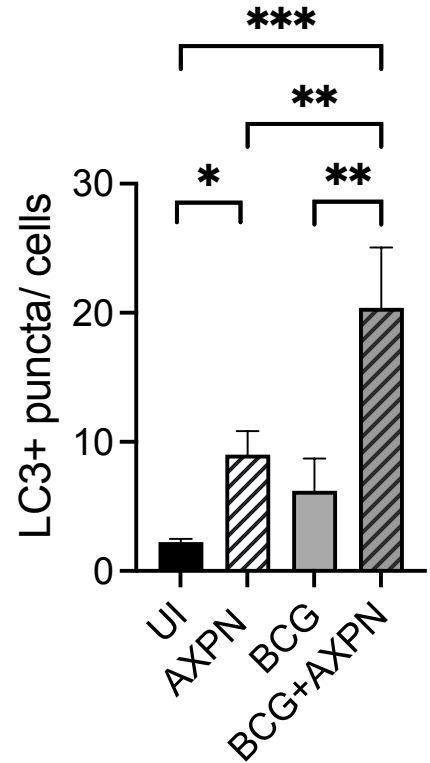

**Supplementary Figure 3.** Amoxapine induces autophagy in macrophages. RAW 264.7 LC3-GFP cells were infected with BCG Danish at an MOI of 10 for 3 hours and then treated with 10  $\mu$ M Amoxapine for 24 hours. Cells were fixed and stained with DAPI. The confocal images were acquired by using an A1 Nikon confocal microscope with a 60X objective lens and puncta analyses were performed by NIS Elements software. One-way ANOVA with Dunnett's test was used for statistical analysis to compare drug-treated and infected groups to the untreated and uninfected (UI) control group. \* $P < 0.05$ ; \*\* $P < 0.01$ , \*\*\* $P < 0.001$ .

**A**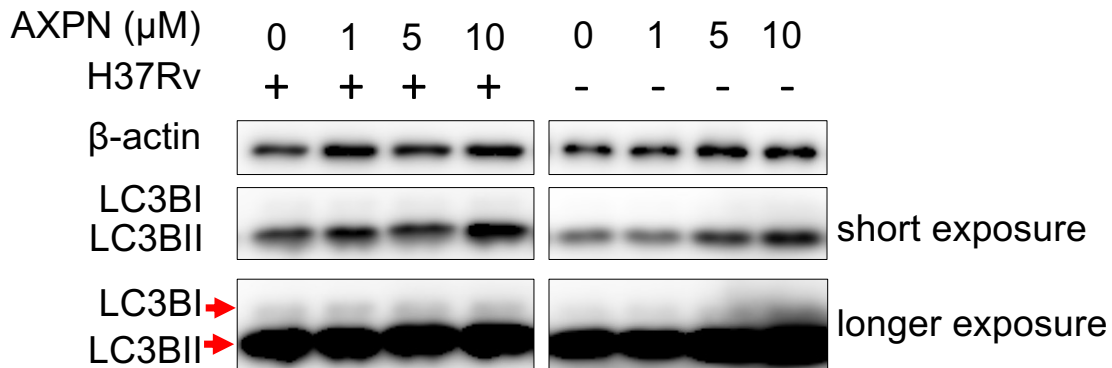**B**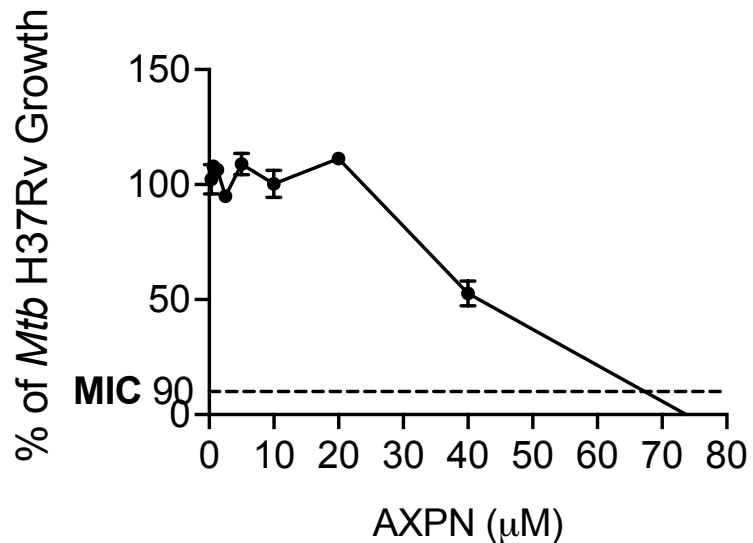

**Supplementary Figure 4.** (A) Amoxapine induces LC3B-II levels in primary murine bone marrow-derived macrophages. Murine BMDMs were infected with *Mtb* H37Rv at an MOI of 10 for 4 hours and treated with Amoxapine at indicated concentrations, or BMDMs were uninfected and treated with Amoxapine for 3 days. LC3B-I, LC3B-II, and actin levels in murine BMDMs were determined by western blots. Shorter and more prolonged exposures are shown. (B) Resazurin microtiter assay was used to evaluate the sensitivity of *Mtb* H37Rv to Amoxapine treatment after 5 days of incubation.

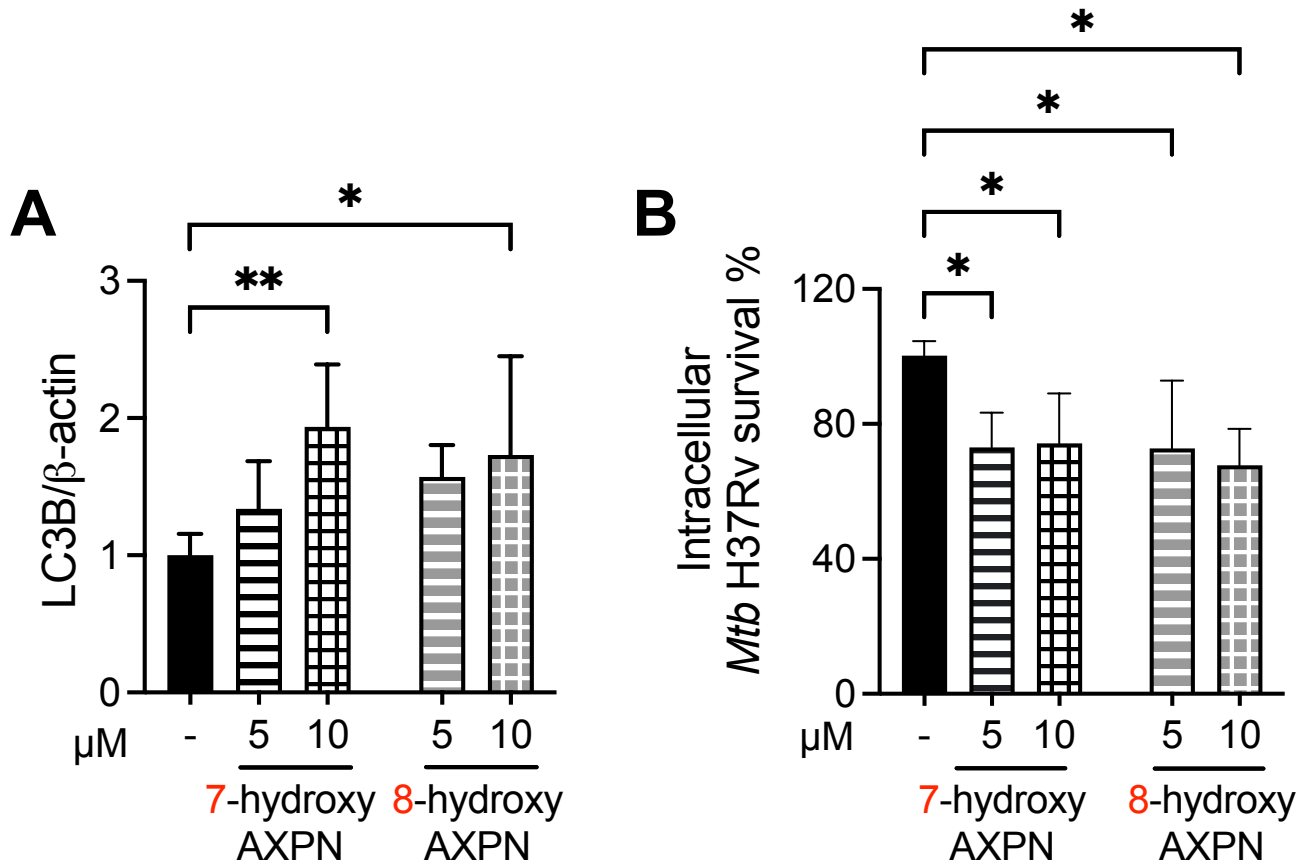

**Supplementary Figure 5.** Post-treatment with metabolites of Amoxapine reduces intracellular survival of *Mtb* H37Rv in THP1 cells. THP1 cells were infected with *Mtb* H37Rv at an MOI of 10 for 4 hours and then treated with 7-hydroxyamoxapine or 8-hydroxyamoxapine at concentrations of 5 and 10  $\mu$ M for 2 days. (A) LC3B-II levels were determined by western blots and quantified by Image J. (B) Intracellular bacterial load was enumerated. The data represent the means  $\pm$  SD for two independent experiments. One-way ANOVA with Dunnett's test was used for statistical analysis to compare drug-treated groups to the untreated control group. \* $P < 0.05$ .

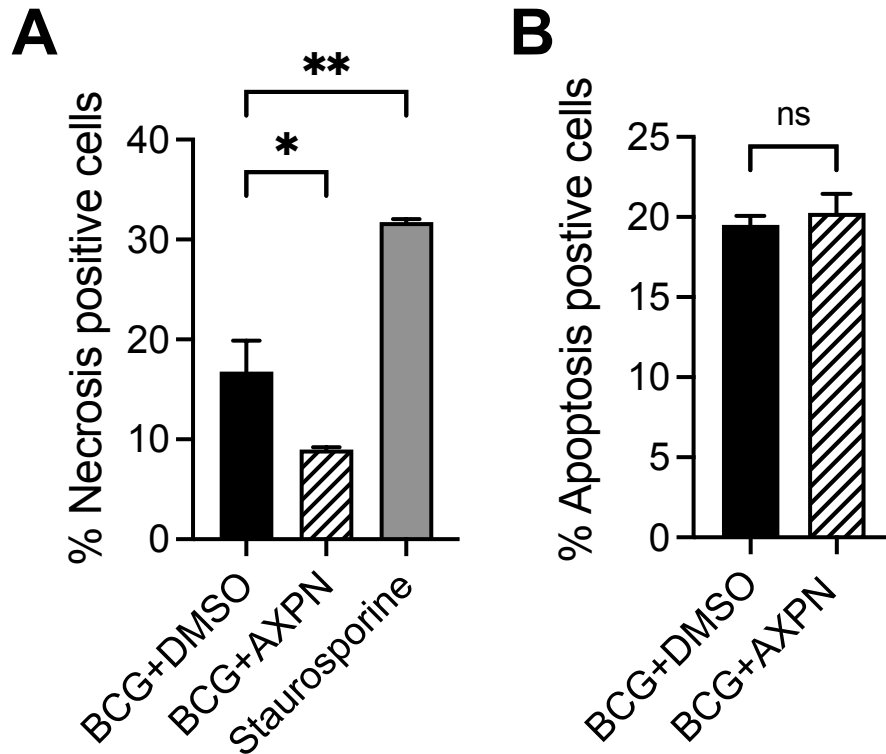

**Supplementary Figure 6.** Post-treatment with Amoxapine inhibits necrosis without affecting apoptosis. RAW 264.7 cells were infected with BCG-Wasabi at an MOI of 10 for 3 hours and then treated with 10  $\mu$ M Amoxapine for 24 hours. Cells were stained with GFP-certified Apoptosis/Necrosis detection kit, followed by flow cytometry analysis. (A) Necrosis positive cells was plotted. (B) Apoptosis in BCG-infected macrophages were plotted. The data represent the means  $\pm$  standard deviations (SD) for two independent experiments. One-way ANOVA or the student t-test was used for statistical analysis. \*P < 0.05; \*\*P < 0.01.
